# Supplementary material for: Optical trapping enhancement from high density silicon nanohole and nanowire arrays for efficient hybrid organic–inorganic solar cells
Source: Royal Society of Chemistry journal article supplement (doi:10.1039/c4ra13536a), 2015-01-01
Supplement: c4ra13536a1.pdf [file c4ra13536a1.pdf]

Supporting Information

**Optical trapping enhancement of high density silicon nanohole  
and nanowire arrays for efficient hybrid organic-inorganic  
solar cells**

**Subramani Thiyagu, Hong-Jhang Syu, Chen-Chih Hsueh, Chien-Ting Liu, Tzu-Ching Lin and Ching-Fuh Lin\***

*<sup>a</sup>Graduate Institute of Photonics and Optoelectronics, National Taiwan University, Taipei 10617, Taiwan (R.O.C.)*

*<sup>b</sup>Graduate Institute of Electronics Engineering, National Taiwan University, Taipei 10617, Taiwan (R.O.C.)*

*<sup>c</sup>Department of Electrical Engineering, National Taiwan University, Taipei 10617, Taiwan (R.O.C.)*

*E-mail: lincf@ntu.edu.tw*

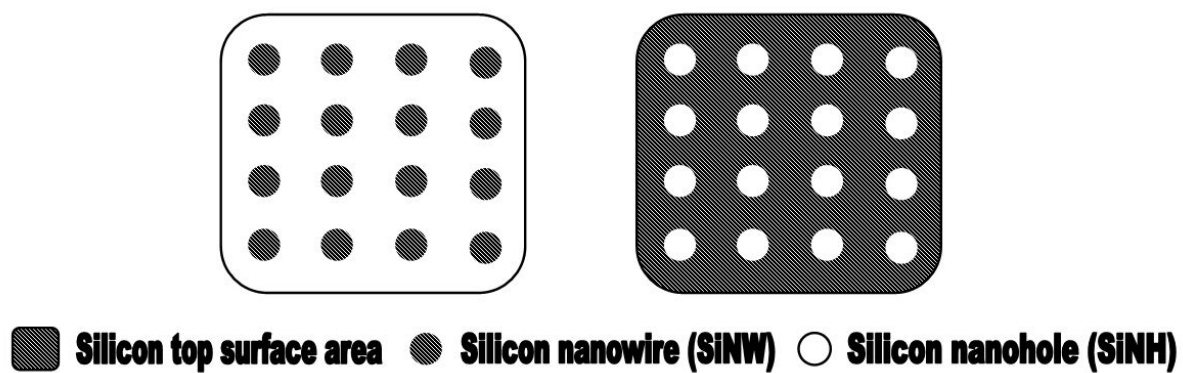

**Figure S1.** Schematic representation of SiNW and SiNH surface area from the top view. Here, SiNH arrays have higher surface area.
